# Supplementary material for: Navigating Fragmented Care: A Qualitative Study on Multimorbidity Management Challenges in Beijing’s Tiered Healthcare System
Source: Research Square preprint supplement (doi:10.21203/rs.3.rs-6860604/v1), 2025-06-18
Supplement: Supplementary file 1 [file be8699689ad707d8873cab93.docx]

**Table 1** Focus group discussion guide for patients with multimorbidity

| 1. Please briefly describe the timing of your diagnosis, the specific conditions you were diagnosed with, and your emotional response at that time. |
| --- |
| 1. Would you be prepared to discuss the experience of living with multiple chronic conditions? |
| 1. Would you be willing to describe your experiences with accessing healthcare services in both institutional and community-based settings? |
| 1. In your perspective, what evidence-based healthcare delivery mechanisms and community support systems could effectively address the complex care needs of individuals managing multiple chronic conditions? |
| 1. How do multiple chronic conditions influence the quality and dynamics of your interactions with healthcare providers? |
| 1. How does multimorbidity contribute to significant healthcare expenditures for you? |
| 1. Are there any additional insights, experiences, or perspectives you would like to contribute regarding the lived experience of managing multiple chronic conditions? |

**Table 2** Consolidated criteria for reporting qualitative studies (COREQ): 32-item checklist

| No Item | Guide questions/description | self-check |
| --- | --- | --- |
| **Domain 1: Research team and reflexivity** | | |
| Personal Characteristics | | |
| 1. Interviewer/facilitator | Which author/s conducted the focus group? | Mentioned in line 88-95 |
| 1. Credentials | What were the researcher’s credentials? | Mentioned in line 88-95 |
| 1. Occupation | What was their occupation at the time of the study? | Mentioned in line 88-95 |
| 1. Gender | Was the researcher male or female? | Mentioned in line 88-95 |
| 1. Experience and training | What experience or training did the researcher have? | Mentioned in line 88-95 |
| Relationship with participants | | |
| 1. Relationship established | Was a relationship established prior to study commencement? | Mentioned in line 119-120 |
| 1. Participant knowledge of the interviewer | What did the participants know about the researcher? | Mentioned in line 119-120 |
| 1. Interviewer characteristics | What characteristics were reported about the interviewer/facilitator? | Mentioned in line 88-95 |
| **Domain 2: study design** | | |
| Theoretical framework |  |  |
| 1. Methodological orientation and theory | What methodological orientation was stated to underpin the study? | Mentioned in line 80-82 |
| Participant selection | | |
| 1. Sampling | How were participants selected? | Mentioned in line 101-115 |
| 1. Method of approach | How were participants approach? | Mentioned in line 96-99 |
| 1. Sample size | How many participants were in the study? | Mentioned in Results |
| 1. Non-participants setting | How many people refused to participate or dropped out? Reasons? | Mentioned in line 120 |
| Setting | | |
| 1. Setting of data collection | Where was the data collected? | Mentioned in line 130-135 |
| 1. Presence of non-participants | Was anyone else present besides the participants and researchers? | Mentioned in line 98-99 |
| 1. Description of sample | What are the important characteristics of the sample? | Mentioned in line 117-119 |
| Data collection | | |
| 1. Interview guide | Were questions, prompts, guides provided by the authors? Was it pilot tested? | Mentioned in line 84-87 |
| 1. Repeat interviews | Were repeat interviews carried out? If yes, how many? | Mentioned in line 120 |
| 1. Audio/visual recording | Did the research use audio or visual recording to collect the data? | Mentioned in line 97-98 |
| 1. Field notes | Were field notes made during and/or after the interview or focus group? | Mentioned in line 97-98 |
| 1. Duration | What was the duration of the interviews or focus group？ | Mentioned in line 96-97 |
| 1. Data saturation | Was data saturation discussed? | Mentioned in line 121-124 |
| 1. Transcripts returned | Were transcripts returned to participants for comment and/or correction? | Mentioned in line 141-143 |
| **Domain 3: analysis and findings** | | |
| Data analysis | | |
| 1. Number of data coders | How many data coders code the data? | Mentioned in line 130-143 |
| 1. Description of the coding tree | Did authors provide a description of the coding tree? | Mentioned in line 130-143 |
| 1. Derivation of themes | Were themes identified in advance or derived from the data? | Mentioned in line 130-143 |
| 1. Software | What software, if applicable, was used to manage the data? | Mentioned in line 130-135 |
| 1. Participant checking | Did participants provide feedback on the findings? | Mentioned in line 136-143 |
| Reporting | | |
| 1. Quotations presented | Were participant quotations presented to illustrate the themes/findings? Was each quotation identified? | Mentioned in line 141-143 |
| 1. Data and findings consistent | Was there consistency between the data presented and the findings? | √ |
| 1. Clarity of major themes | Were major themes clearly presented in the findings? | Mentioned in results |
| 1. Clarity of minor themes | Is there a description of diverse cases or discussion of minor themes? | Mentioned in results and discussion |
